# Supplementary material for: Characteristics of MGUS and Multiple Myeloma According to the Target of Monoclonal Immunoglobulins, Glucosylsphingosine, or Epstein-Barr Virus EBNA-1
Source: PubMed Central journal article supplement (PMC7281552; doi:10.3390/cancers12051254), 2020-05-15
Supplement: cancers-12-01254-s001.pdf [file cancers-12-01254-s001.pdf]

Article

# Characteristics of MGUS and Multiple Myeloma According to the Target of Monoclonal Immunoglobulins, Glucosylsphingosine or Epstein-Barr Virus EBNA-1

Adrien Bosseboeuf, Nicolas Mennesson, Sophie Allain-Maillet, Anne Tallet, Eric Piver, Olivier Decaux, Caroline Moreau, Philippe Moreau, Philippe Lehours, Francis Mégraud, Valéry Salle, Edith Bigot-Corbel, Jean Harb, and Sylvie Hermouet

Supplementary Materials.

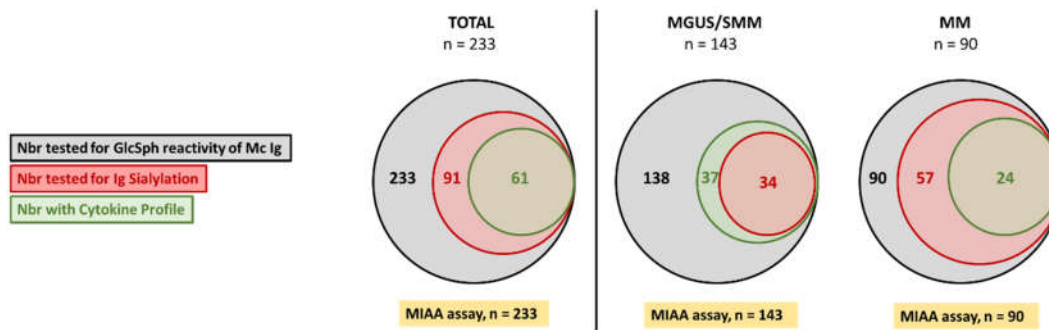

**Figure S1.** Representation of the numbers of MGUS/SMM and MM patients for whom the four different assays used in the study were performed.

Four assays were used in this retrospective assay: the MIAA assay (performed for all patients included in this study), the GlcSph assay (performed for all but 5 patients), the Ig sialylation assay and multiplexed cytokine quantification (performed for fractions of patients, as indicated).

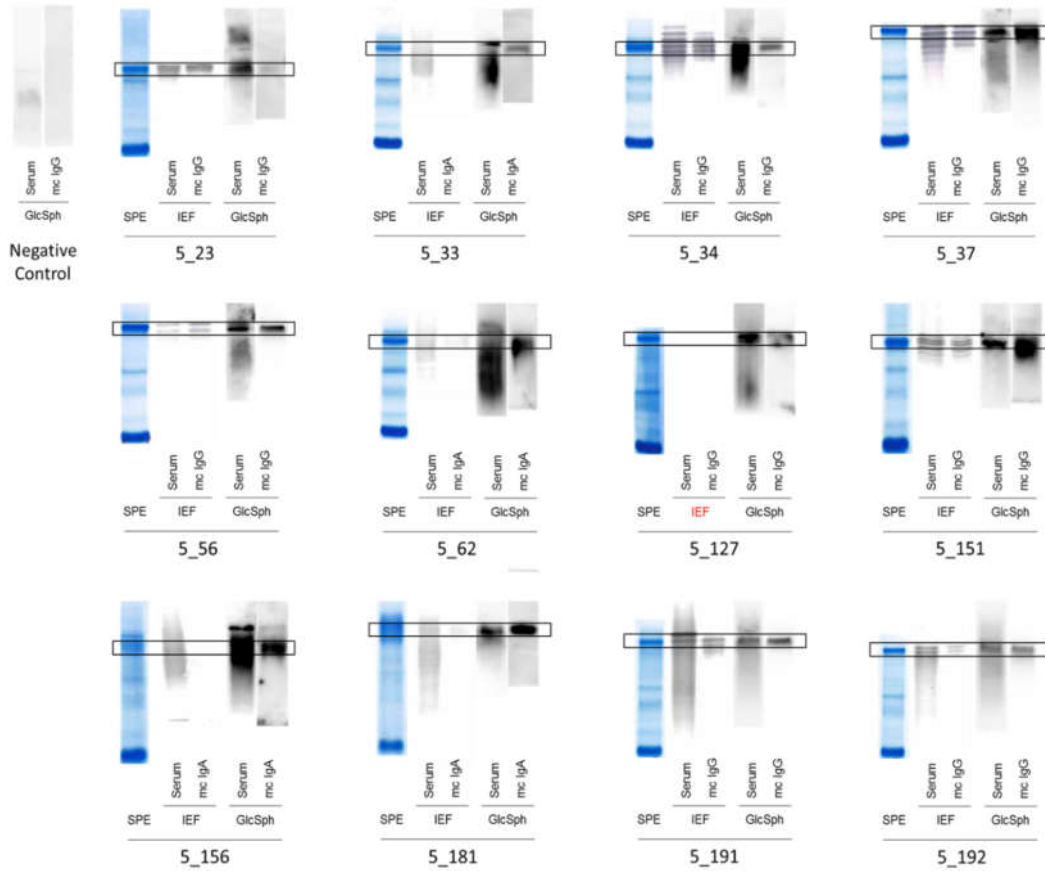

**Figure 2.** Results of GlcSph assays for additional MGUS patients.

Results of the analysis of GlcSph-reactivity of serum Igs and monoclonal Igs obtained for 12 additional MGUS patients: Measurement of Ig concentration, separation of monoclonal Igs from other Igs, and verification of purity are performed as published [5–7,14,15]. Signals corresponding to the patient’s monoclonal Ig are encircled. The negative control is a patient with no GlcSph-reactive Ig in serum. SPE = Serum protein electrophoresis; Mc Ig = purified monoclonal Ig.

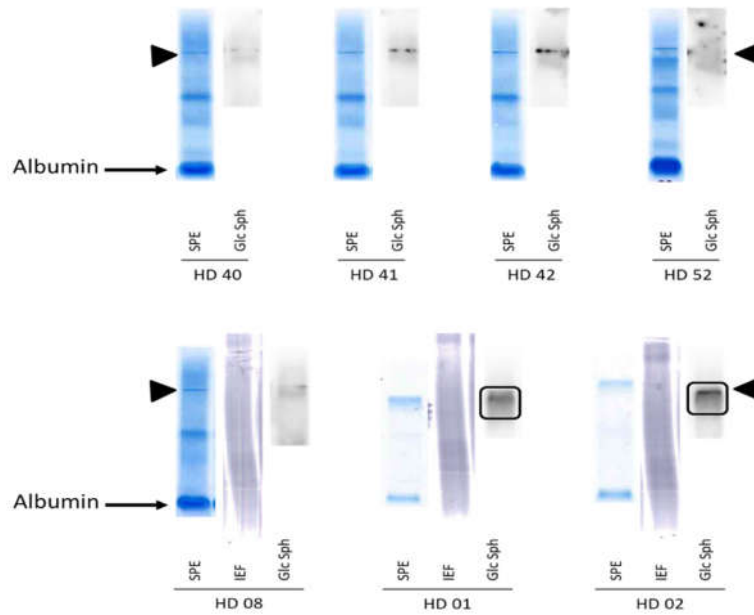

**Figure S3.** Results of GlcSph assays for healthy donors.

Examples of results of the GlcSph assay obtained for serum Igs from healthy donors: After measurement of Ig concentration, GlcSph-specific immunoblotting was performed as described in Methods. Images of the SPE and GlcSph immunoblot are shown in parallel; black arrows indicate the line of sample deposit. Forty-one healthy donors were tested, and 39 were found to be negative for GlcSph-reactive Igs; the results of donors HD40, HD41, HD52 and HD08 are shown as examples of serum with no GlcSph-reactive Igs. The presence of polyclonal GlcSph-reactive Igs was detected for 2 healthy donors (HD01, HD02); the signals corresponding to GlcSph-reactive Igs are encircled. IEF were performed for patients HD08, HD01, and HD02, which confirmed the absence of monoclonal Ig in the serum of these individuals.

**Table S1.** Characteristics of MGUS/SMM and MM patients.

| <b>Patient Parameters</b>       | <b>Healthy Donors*</b> | <b>MGUS/SMM*</b> | <b>MM</b>     |
|---------------------------------|------------------------|------------------|---------------|
| Nbr of patients (n)             | 41                     | 143              | 90            |
| Sex (M/F) (Male %)              | ND                     | 60/45 (57.1%)    | 50/40 (54.5%) |
| Age (Years)                     |                        |                  |               |
| Median                          | ND                     | 68.1             | 67.0          |
| Range (Min-Max)                 | ND                     | 31–95            | 42–92         |
| Monoclonal Ig (g/L)             |                        |                  |               |
| Median                          | NA                     | 16.0             | 23.0          |
| Range (Min-Max)                 | NA                     | 4.0–39.8         | 4.0–68.0      |
| $\beta_2$ -microglobulin (mg/L) |                        |                  |               |
| Median                          | ND                     | 2.4              | 3.1           |
| Range (Min-Max)                 | ND                     | 1.1–10.1         | 1.3–14.0      |
| Bone lesions (%)                | NA                     | 5/68 (7.4%)      | 59/86 (68.6%) |
| Leukocytes ( $\times 10^9/L$ )  |                        |                  |               |
| Median                          | ND                     | 7.1              | 5.2           |
| Range (Min-Max)                 | ND                     | 3.3–16.0         | 1.3–19.0      |
| Hemoglobin (g/dL)               |                        |                  |               |
| Median                          | ND                     | 13.3             | 10.7          |
| Range (Min-Max)                 | ND                     | 7.6–16.9         | 5.4–15.5      |
| Platelets ( $\times 10^9/L$ )   |                        |                  |               |
| Median                          | ND                     | 225.0            | 199.5         |
| Range (Min-Max)                 | ND                     | 75.0–580.0       | 15.0–529.0    |
| ISS Stage III (%)               | NA                     | NA               | 14 (28.0%)    |
| DSS Stage III (%)               | NA                     | NA               | 32 (43.8%)    |

\*For healthy donors and certain MGUS patients, biological and clinical information was not available or partial. Cytogenetics data were not available for most MM patients. Nbr = number; ND: no data; NA: not applicable.

**Table S2.** Characteristics of MGUS/SMM patients with GlcSph-reactive Ig(s) in serum.

| MGUS/SMM Patients      | Without GlcSph-<br>Reactive Ig(s)<br>(n = 75) | With GlcSph-reactive<br>Non-clonal Ig(s)<br>(n = 68) | With GlcSph-<br>Reactive Mc Ig<br>(n = 24) | With EBV EBNA-1-<br>Reactive Mc Ig<br>(n = 53) |
|------------------------|-----------------------------------------------|------------------------------------------------------|--------------------------------------------|------------------------------------------------|
| Sex                    |                                               |                                                      |                                            |                                                |
| Nbr                    | 63                                            | 65                                                   | 24                                         | 49                                             |
| M/F (Male %)           | 36/27 (57.1%)                                 | 37/28 (56.9%)                                        | 11/13 (45.8%)                              | 34/15 (69.4%) <sup>1</sup>                     |
| Age at diagnosis (yrs) |                                               |                                                      |                                            |                                                |
| Nbr                    | 63                                            | 65                                                   | 24                                         | 49                                             |
| Median                 | 67.6                                          | 68.7                                                 | 73.5                                       | 69.8                                           |
| Range (Min-Max)        | 41–95                                         | 31–89                                                | 53–89                                      | 31–89                                          |
| Amount of Mc Ig (g/L)  |                                               |                                                      |                                            |                                                |
| Nbr                    | 68                                            | 67                                                   | 24                                         | 53                                             |
| Median                 | 17.2                                          | 13.0 <sup>2</sup>                                    | 15.0                                       | 16.7                                           |
| Range (Min-Max)        | 4.5–39.8                                      | 4.0–38.4                                             | 6.0–29.0                                   | 4.5–33.5                                       |

Nbr: number; Mc Ig = purified monoclonal Ig. <sup>1</sup>  $p = 0.0294$  vs MGUS/SMM patients without EBNA-1-reactive Mc Ig, Fisher exact test; <sup>2</sup>  $p = 0.0123$  vs MGUS/SMM patients without GlcSph-reactive Igs, Mann Whitney test.

**Table S3.** List of cytokines, chemokines and receptors quantified in the serum of patients, and values observed in healthy donors.

| Molecules.      | Healthy Donors (n = 9) |                 |
|-----------------|------------------------|-----------------|
|                 | Median (pg/mL)         | Range (pg/mL)   |
| IL-4            | 4.50                   | 3.61-5.15       |
| IL-10           | 0.81                   | ND-165.5        |
| IL-11           | ND                     | ND-ND           |
| IL-13           | 1.19                   | 0.05-2.84       |
| IL-1 $\beta$    | 1.32                   | 0.62-1.53       |
| IL-1R $\alpha$  | 73.28                  | 13.52-128.28    |
| IL-2            | ND                     | ND-ND           |
| IL-2R $\alpha$  | 69.81                  | ND-162.12       |
| IL-6            | ND                     | ND-7.56         |
| IL-7            | 0.62                   | ND-10.57        |
| IL-8            | 17.92                  | 5.26-43.15      |
| IL-9            | 59.15                  | 42.62-96.80     |
| IL-12(p70)      | 15.91                  | 11.09-35.49     |
| IL-15           | ND                     | ND-ND           |
| IL-23           | ND                     | ND-2.77         |
| IFN- $\alpha$ 2 | ND                     | ND-2.89         |
| IFN- $\gamma$   | 30.91                  | 17.23-34.72     |
| TNF- $\alpha$   | 32.68                  | 25.75-38.67     |
| MIP-1 $\alpha$  | 2.50                   | 0.98-4.96       |
| G-CSF           | 17.67                  | 9.49-24.46      |
| GM-CSF          | ND                     | ND-ND           |
| FGF basic       | 45.15                  | ND-70.39        |
| HGF             | 302.57                 | 125.14-471.16   |
| PDGF-bb         | 543.07                 | 271.84-666.48   |
| TGF- $\beta$ 1  | 16764.8                | 4928.0-47560.0  |
| TGF- $\beta$ 2  | 2553.75                | 1512.50-3078.00 |
| TGF- $\beta$ 3  | 441.60                 | 300.00-789.60   |
| IL-5            | ND                     | ND-ND           |
| IP-10           | 692.68                 | 482.47-1392.16  |
| LIF             | ND                     | ND-4.52         |
| VEGF            | ND                     | ND-13.53        |
| RANTES          | 11582.3                | 9480.4-14531.4  |
| SDF-1 $\alpha$  | 750.42                 | 609.70-969.86   |
| Eotaxin         | 141.24                 | 91.56-318.96    |
| MIG             | 325.32                 | 210.74-1192.63  |
| MCP-1 (MCAF)    | ND                     | ND-ND           |
| MIP-1 $\beta$   | 421.48                 | 310.31-726.69   |
| IL-17           | 216.39                 | 124.15-254.54   |
| IL-22           | ND                     | ND-ND           |
| IL-26           | ND                     | ND-1.71         |
| IL-33           | 0.27                   | ND-3.46         |
| Leptin, Males   | 2200.37                | 583.36-4860.99  |
| Leptin, Females | 7102.62                | 4005.0-10200.2  |

Molecules in blue were found to be significantly elevated in MGUS and MM compared to healthy donors [15]. The values obtained for healthy donors, previously published [15], are provided for information. ND: not detectable (below detection level).
